# Supplementary material for: First-principles study on strain-engineered photocatalytic performance in ferroelectric K(Ta0.5Nb0.5)O3
Source: Royal Society of Chemistry journal article supplement (doi:10.1039/d5ra09223j), 2026-05-08
Supplement: d5ra09223j1.pdf [file d5ra09223j1.pdf]

# First-Principles Study on Strain-Engineered Photocatalytic Performance in Ferroelectric $\text{K}(\text{Ta}_{0.5}\text{Nb}_{0.5})\text{O}_3$

Xue Wen <sup>1</sup>, Rui Xia <sup>1</sup>, Yi-Min Zheng <sup>1</sup>, Qiao-Yue Chen <sup>1</sup>, Can Zhao <sup>1</sup>, Xin-Yuan  
Zhou <sup>1</sup>, Hong-Mei Yin <sup>1,2</sup>, and Li-Li Zhang <sup>\*1</sup>, Yi-Neng Huang <sup>\*1,3</sup>

<sup>1</sup> College of Physics and Technology, Yili Normal University, Xinjiang Condensed Matter Phase  
Transitions and Microstructures Laboratory, Yining 835000, China

<sup>2</sup> College of Physical Science and Technology, Xinjiang University, Urumqi, 830046, China.

<sup>3</sup> National Laboratory of Solid State Microstructures, School of Physics, Nanjing University,  
Nanjing 210093, China.

| Strain/Pa   | -5 (PBE) | 0 (PBE) | 5 (PBE) | -5 (HSE06) | 0 (HSE06) | 5 (HSE06) |
|-------------|----------|---------|---------|------------|-----------|-----------|
| band gap/eV | 1.915    | 2.21    | 1.83    | 3.34       | 4.05      | 3.60      |

Table A1. The crystal system of KTN under different strain effects.
